# Supplementary material for: Engineering crystal planes and band structure of 2D tin sulfide nanosheets and investigating their photocatalytic degradation performance
Source: Royal Society of Chemistry journal article supplement (doi:10.1039/d3nj03896c), 2023-01-01
Supplement: d3nj03896c1.pdf [file d3nj03896c1.pdf]

*Supporting Information*

**Engineering crystal planes and band structure of 2D tin sulfide nanosheets and its photocatalytic degradation performance**

Zhixin Jia,<sup>a</sup> Xiaofeng shuai,<sup>b</sup> Ruihua Zhao,<sup>b,c</sup> Jianping Du\*<sup>a, d</sup>

<sup>a</sup> College of Chemistry, Taiyuan University of Technology, Taiyuan 030024, P. R. China

<sup>b</sup> College of Chemical Engineering and Technology, Taiyuan University of Technology, Taiyuan University of Technology, Taiyuan 030024, P. R. China.

<sup>c</sup> Shanxi Kunming Tobacco Co., Ltd., 21 Dachang South Road, Taiyuan 030032, P. R. China

<sup>d</sup> Key Laboratory of Gas Energy Efficient and Clean Utilization, Taiyuan University of Technology, Taiyuan 030024, P. R. China

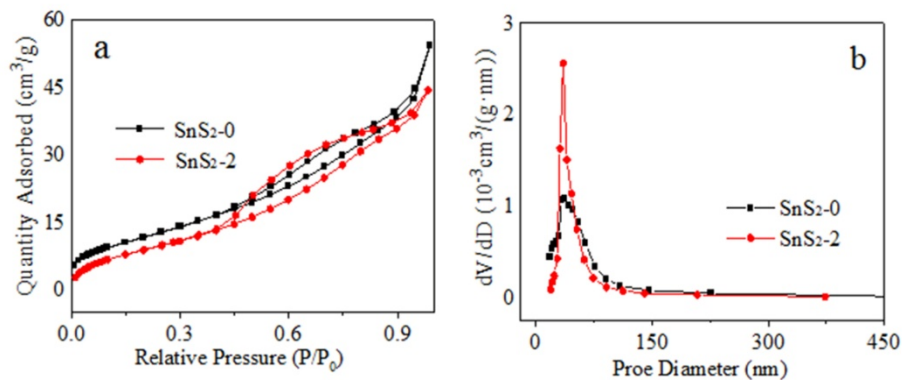

**Figure S1** (a)  $N_2$  adsorption-desorption isotherm and (b) pore size distribution of  $SnS_2-0$  and  $SnS_2-2$

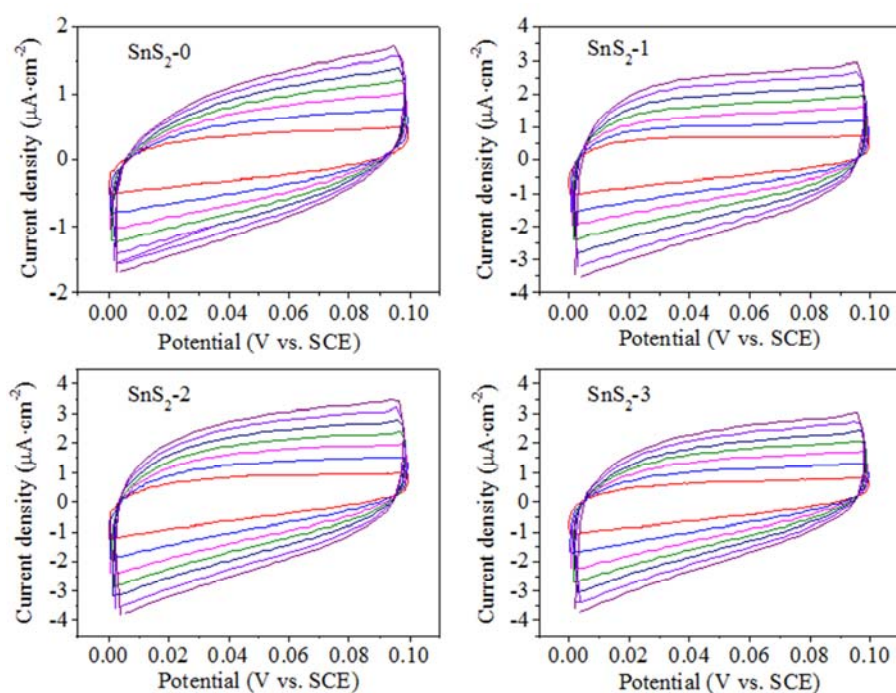

**Figure S2** Cyclic voltammety curves of  $SnS_2-x$  at different scan rates

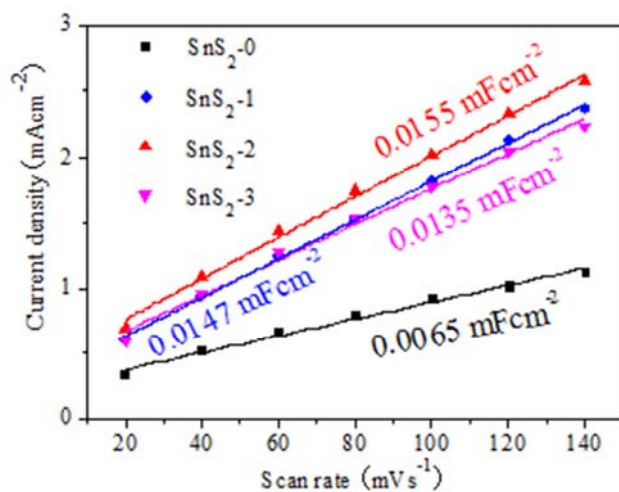

**Figure S3** The linear relationship between the current density and scan rate

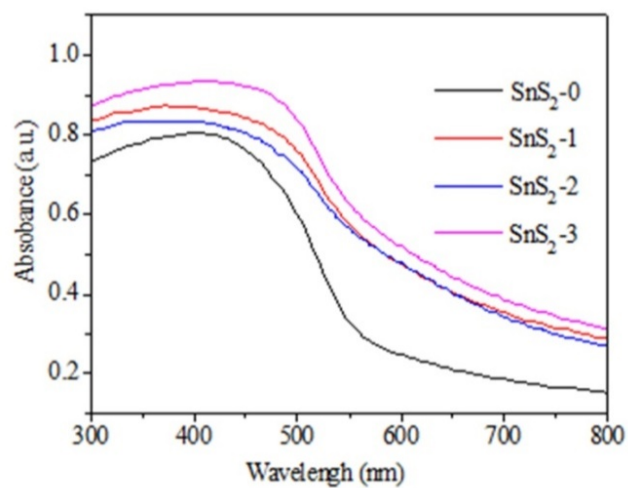

**Figure S4** UV-Vis diffuse reflectance spectra (DRS) of different SnS<sub>2</sub> materials

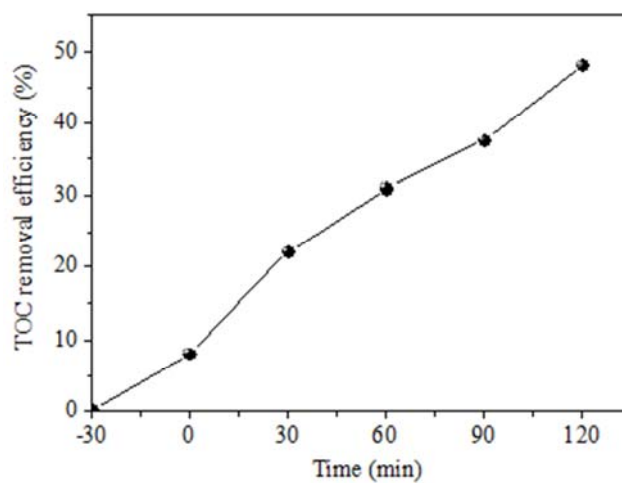

**Figure S5** TOC removal efficiency of SnS<sub>2</sub>-2 during the degradation of RhB

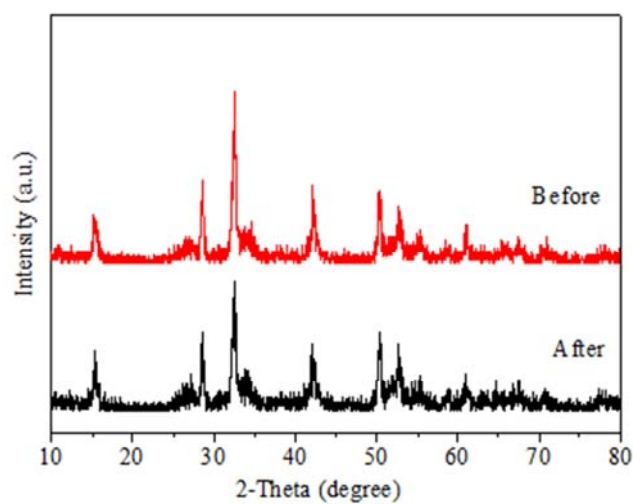

**Figure S6** XRD patterns of SnS<sub>2</sub>-2 before and after reactions

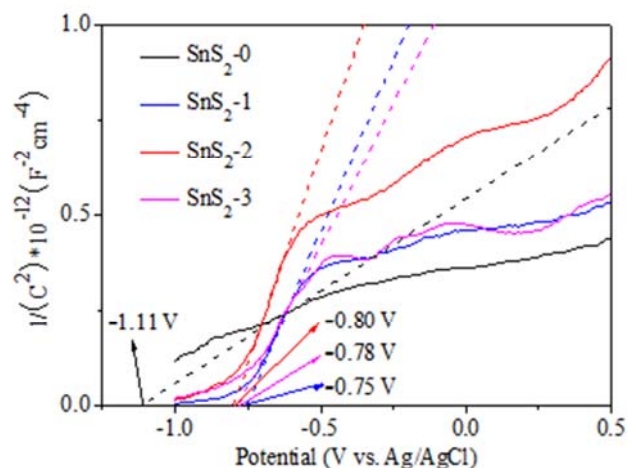

**Figure S7** Mott-Schottky plot of SnS<sub>2-x</sub> materials

**Table S1** the band gap, conduction band and valence band potential of SnS<sub>2-x</sub>

| Catalyst           | $E_g$  | $E_{CB}$ | $E_{VB}$ |
|--------------------|--------|----------|----------|
| SnS <sub>2-0</sub> | 1.91eV | -1.01eV  | 0.9eV    |
| SnS <sub>2-1</sub> | 1.87eV | -0.65eV  | 1.22eV   |
| SnS <sub>2-2</sub> | 1.42eV | -0.70eV  | 0.72eV   |
| SnS <sub>2-3</sub> | 1.55eV | -0.68eV  | 0.87eV   |

**Table S2** Photocatalytic activity of SnS<sub>2</sub> compared with other reported materials

| Photocatalysts                                  | Catal. dosage (g L <sup>-1</sup> ) | Rh.B Concentration (mg L <sup>-1</sup> ) | Light Source               | Time (min)/ Degradation (%) | Ref. |
|-------------------------------------------------|------------------------------------|------------------------------------------|----------------------------|-----------------------------|------|
| SnO <sub>2</sub> /ZnS                           | 1                                  | 10                                       | 500W Xe lamp               | 150/96                      | [1]  |
| SnS <sub>2</sub> /NH <sub>2</sub> -MIL-125 (Ti) | 1                                  | 40                                       | 300W Xe lamp<br>80 W       | 80/90.5                     | [2]  |
| SnS nanoparticles                               | 1                                  | 14.4                                     | high-pressure mercury lamp | 180/90.97                   | [3]  |
| g-C <sub>3</sub> N <sub>4</sub> /BiOBr          | 1                                  | 10                                       | 300W Xe lamp<br>10 W       | 150/ 97.9                   | [4]  |
| BiFeO <sub>3</sub> /SnS <sub>2</sub> NCs        | 0.1                                | 15                                       | tungsten halogen lamp      | 120/78                      | [5]  |
| SnO <sub>2</sub> /TiO <sub>2</sub> /PVDF        | N.A.                               | 10                                       | 250W Xe lamp               | 240/92                      | [6]  |
| SnS <sub>2</sub> -CdO                           | 0.06                               | 12                                       | 350W Xe lamp               | 210/86.11                   | [7]  |

|                     |     |     |              |          |           |
|---------------------|-----|-----|--------------|----------|-----------|
| ZnO/CA/SnS          | 0.6 | 4.8 | Sunlight     | 175/99   | [8]       |
| SnS <sub>2</sub> -2 | 0.5 | 20  | 300W Xe lamp | 120/94.5 | This work |

## References

- [1] L. Hu, F. Chen, P. Hu, L. Zou, X. Hu, Hydrothermal synthesis of SnO<sub>2</sub>/ZnS nanocomposite as a photocatalyst for degradation of Rhodamine B under simulated and natural sunlight, *J. Mol. Catal. A Chem.*, 2016, 411, 203-213.
- [2] L. Ling, Y. Tu, X. Long, Q. Li, J. Gu, N. Liu, Z. Li, The one-step synthesis of multiphase SnS<sub>2</sub> modified by NH<sub>2</sub>-MIL-125(Ti) with effective photocatalytic performance for Rhodamine B under visible light, *Opt. Mater.*, 2021, 111, 110564.
- [3] A.E. Oluwalana, P.A. Ajibade, Preparation and morphological studies of tin sulfide nanoparticles and use as efficient photocatalysts for the degradation of rhodamine B and phenol, *Nanotechnol. Rev.*, 2022, 11, 883-896.
- [4] M. Zhou, W. Huang, Y. Zhao, Z. Jin, X. Hua, K. Li, L. Tang, Z. Cai, 2D g-C<sub>3</sub>N<sub>4</sub>/BiOBr heterojunctions with enhanced visible light photocatalytic activity, *J. Nanopart. Res.*, 2020, 22, 13.
- [5] M. Arunkumar, S. Veerakumar, V. Mohanavel, J. Vairamuthu, V. Vijayan, N. Senthilkumar, A Novel Visible Light-Driven p-Type BiFeO<sub>3</sub>/n-Type SnS<sub>2</sub> Heterojunction Photocatalyst for Efficient Charge Separation and Enhanced Photocatalytic Activity, *J. Clust. Sci.*, 2021, 32, 1431-1439.
- [6] W. Hong, C. Li, T. Tang, H. Xu, Y. Yu, G. Liu, F. Wang, C. Lei, H. Zhu, The photocatalytic activity of the SnO<sub>2</sub>/TiO<sub>2</sub>/PVDF composite membrane in rhodamine B degradation, *New J. Chem.*, 2021, 45, 2631-2642.
- [7] J. Srivind, V.S. Nagarethinam, M. Suganya, S. Balamurugan, D. Prabha, A.R. Balu, Visible light irradiated photocatalytic performance of SnS<sub>2</sub>-CdO nanocomposite against the degradation of rhodamine B (cationic) and congo red (anionic) dyes, *Mater. Sci. Eng. B*, 2020, 255, 14530.
- [8] S. Jayswal, R.S. Moirangthem, Construction of a solar spectrum active SnS/ZnO p-n heterojunction as a highly efficient photocatalyst: the effect of the sensitization process on its performance, *New J. Chem.*, 2018, 42, 13689-13701.
